# Supplementary material
Source: publisher figshare collection journal article supplement (https://tandf.figshare.com/ndownloader/files/16235708)
Supplement: Supplementary file 1 [file 16235708]

**Supplementary Material**

**Supplementary Table 1.** Adherence to ICS/LABA treatment among SPRINT study participants with asthma and COPD receiving treatment with DuoResp Spiromax, and with ACT or CAT score (as appropriate) available, as assessed by MMAS-8® score and adherence classification

|  | **Asthma**  **(*n =* 235)** | **COPD**  **(*n =* 107)** | **Total**  **(*N =* 342)** | **p-value** |
| --- | --- | --- | --- | --- |
| ***MMAS-8 score*** | | | |  |
| Median (P25, P75) | 7 (5.8, 8) | 7.8 (6, 8) | 7 (5.8, 8) | 0.008 |
| *Data unavailable* | 7 | 4 | 11 |
| ***MMAS-8 adherence classification, n (%)*** | | | |  |
| High (score = 8) | 77 (33.8) | 50 (48.5) | 127 (38.4) | 0.027 |
| Medium (6 ≤ score < 8) | 81 (35.5) | 32 (31.1) | 113 (34.1) |
| Low | 70 (30.7) | 21 (20.4) | 91 (27.5) |
| *Data unavailable* | 7 | 4 | 11 |

COPD, chronic obstructive pulmonary disease; ICS, inhaled corticosteroid; MMAS-8, 8-item Morisky Medication Adherence Scale; P25, 25th percentile; P75, 75th percentile; SD, standard deviation

*Note:* Use of the ©MMAS is protected by US copyright laws. Permission for use is required. A license agreement is available from: Donald E. Morisky, ScD, ScM, MSPH, Professor, Department of Community Health Sciences, UCLA School of Public Health, 650 Charles E. Young Drive South, Los Angeles, CA, 90095-1772.

**Supplementary Table 2.** Patient satisfaction with the DuoResp Spiromax inhaler, self-assessed on a 10-point scale

|  | **Asthma**  **(*n =* 235)** | **COPD**  **(*n =* 107)** | **Total (*N =* 342)** | **p-value** |
| --- | --- | --- | --- | --- |
| ***Patient satisfaction score*** | | | | |
| Mean (SD) | 9 (1.5) | 8.6 (1.8) | 8.9 (1.6) | 0.057 |
| *Data unavailable* | *2* | *4* | *6* |
| ***Satisfaction classification, n (%)*** | | | | |
| Not satisfied (1–3) | 2 (0.9) | 2 (1.9) | 4 (1.2) | 0.451 |
| Satisfied (4–7) | 29 (12.4) | 16 (15.5) | 45 (13.4) |
| Very satisfied (8–10) | 202 (86.7) | 85 (82.5) | 287 (85.4) |
| *Data unavailable* | *2* | *4* | *6* |

COPD, chronic obstructive pulmonary disease; SD, standard deviation
